# Supplementary material
Source: PubMed Central journal article supplement (PMC9523828)
Supplement: NIHMS1835667-supplement-SUPINFO.pdf [file NIHMS1835667-supplement-SUPINFO.pdf]

**Supplementary Table 1**

| Metabolites and their isotopomers                                            | m/z   | Retention time (min) |
|------------------------------------------------------------------------------|-------|----------------------|
| M+0 Succinate (Relative quantification and enrichment analysis-TBDMS method) | 289.1 | 18.0                 |
| M+1 Succinate (Relative quantification and enrichment analysis-TBDMS method) | 290.1 | 18.0                 |
| M+2 Succinate (Relative quantification and enrichment analysis-TBDMS method) | 291.1 | 18.0                 |
| M+3 Succinate (Relative quantification and enrichment analysis-TBDMS method) | 292.1 | 18.0                 |
| M+4 Succinate (Relative quantification and enrichment analysis-TBDMS method) | 293.1 | 18.0                 |
| M+0 Succinate (Absolute quantification-TMS method)                           | 247.0 | 10.8                 |
| M+4 Succinate (Absolute quantification-TMS method)                           | 251.0 | 10.7                 |
| M+0 Fumarate                                                                 | 287.1 | 18.4                 |
| M+1 Fumarate                                                                 | 288.1 | 18.4                 |
| M+2 Fumarate                                                                 | 289.1 | 18.4                 |
| M+3 Fumarate                                                                 | 290.1 | 18.4                 |
| M+4 Fumarate                                                                 | 291.1 | 18.4                 |
| M+0 Malate                                                                   | 419.3 | 23.0                 |
| M+1 Malate                                                                   | 420.3 | 23.0                 |
| M+2 Malate                                                                   | 421.3 | 23.0                 |
| M+3 Malate                                                                   | 422.3 | 23.0                 |
| M+4 Malate                                                                   | 423.3 | 23.0                 |
| M+0 Citrate                                                                  | 459.3 | 29.0                 |
| M+1 Citrate                                                                  | 460.3 | 29.0                 |
| M+2 Citrate                                                                  | 461.3 | 29.0                 |
| M+3 Citrate                                                                  | 462.3 | 29.0                 |
| M+4 Citrate                                                                  | 463.3 | 29.0                 |
| M+5 Citrate                                                                  | 464.3 | 29.0                 |
| M+6 Citrate                                                                  | 465.3 | 29.0                 |
| Norvaline                                                                    | 288.2 | 16.6                 |
| M+0 Fructose                                                                 | 328.0 | 19.8                 |
| M+1 Fructose                                                                 | 329.0 | 19.8                 |
| M+2 Fructose                                                                 | 330.0 | 19.8                 |
| M+3 Fructose                                                                 | 331.0 | 19.8                 |
| M+4 Fructose                                                                 | 332.0 | 19.8                 |
| M+5 Fructose                                                                 | 333.0 | 19.8                 |
| M+6 Fructose                                                                 | 334.0 | 19.8                 |
| M+0 Glucose                                                                  | 387.0 | 18.7                 |
| M+1 Glucose                                                                  | 388.0 | 18.7                 |
| M+2 Glucose                                                                  | 389.0 | 18.7                 |
| M+3 Glucose                                                                  | 390.0 | 18.7                 |
| M+4/6 Glucose                                                                | 391.0 | 18.7                 |
| 2DG                                                                          | 182.1 | 17.1                 |
